# Supplementary material for: Cell-Free Enzymatic Conversion of Spent Coffee Grounds Into the Platform Chemical Lactic Acid
Source: PubMed Central journal article supplement (PMC6901390; doi:10.3389/fbioe.2019.00389), 2019-12-03
Supplement: Data_Sheet_1.pdf [file Data_Sheet_1.pdf]

## *Supplementary Material*

### **Cell-free enzymatic conversion of spent coffee grounds into the platform chemical lactic acid**

**Dominik Kopp<sup>1</sup>, Robert D. Willows<sup>2</sup>, Anwar Sunna<sup>1,2\*</sup>**

<sup>1</sup>Department of Molecular Sciences, Macquarie University, Sydney, New South Wales, Australia

<sup>2</sup>Biomolecular Discovery and Design Research Centre, Macquarie University, Sydney, New South Wales, Australia

**\* Correspondence:**

A/Prof. Anwar Sunna

anwar.sunna@mq.edu.au

**Table S1** Oligonucleotides used in the study. All oligonucleotides were synthesised by IDT DNA Technologies (Singapore). For oligonucleotide sequences, restriction sites are written in lowercase.

| Oligonucleotide name | Gene amplified           | Oligonucleotide sequence<br>(5' → 3') |
|----------------------|--------------------------|---------------------------------------|
| AldT-fw              | aldohexose dehydrogenase | TGATggatccCATGTTTCAGCG<br>ATCTAAGGGA  |
| AldT-rev             | aldohexose dehydrogenase | ATTATgaattcCTCATTCTGGC<br>GTGCTTATGG  |
| Ta1157_EcoRI_fw      | KDG aldolase             | ATATTgaattcCTACAAGGGTA<br>TCGTAACGCC  |
| Ta1157_HindIII_rev   | KDG aldolase             | TGATAagcttATTGCTTCTTCG<br>GGATTTTG    |
| BsLDH_BamHI_fw       | L-lactate dehydrogenase  | ATTATggatccTAAAAACAAC<br>GGTGGAGCCC   |
| BsLDH_HindIII_rev    | L-lactate dehydrogenase  | TGATATAagcttTCATCGCGTA<br>AAAGCACGG   |

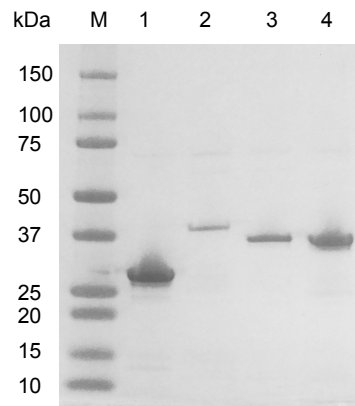

**Figure S1** SDS-PAGE of the purified enzymes for the cell-free conversion of mannose to LA. AldT (1) and LDH (4) were expressed in *E. coli* BL21 cells. ManD (2) and KDGA (3) were expressed in BL21-CodonPlus (DE3)-RIL cells. Molecular weights of AldT, ManD, KDGA and LDH were 29 kDa, 42 kDa, 37 kDa and 36 kDa respectively. All enzymes were purified via their N-terminal His-tag using metal-affinity chromatography. M: Bio-Rad Precision Plus Protein Standard.

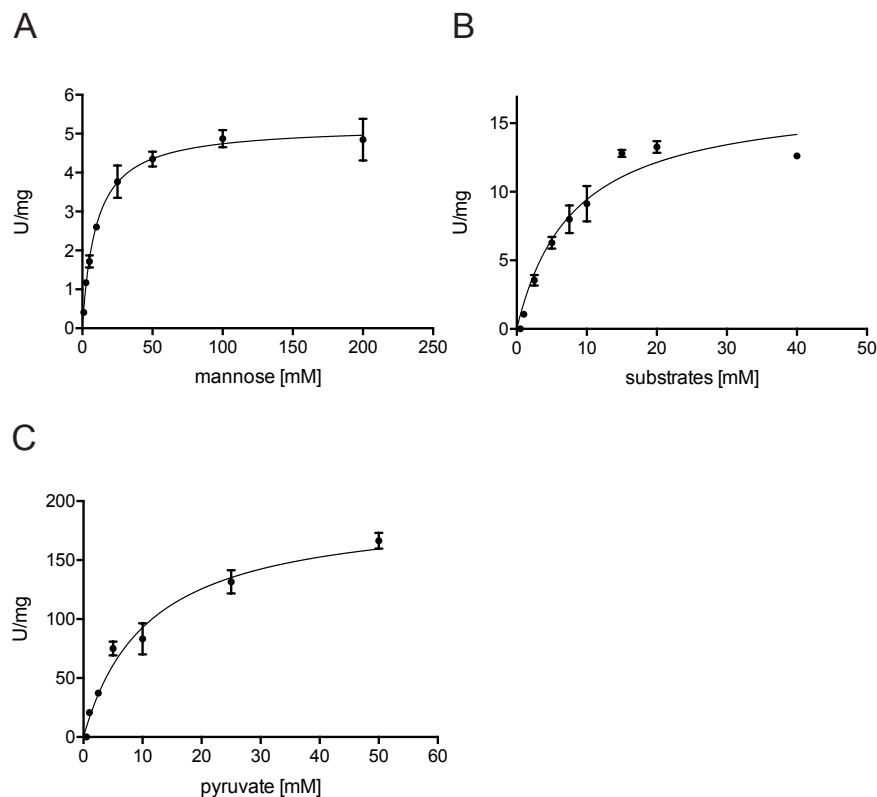

**Figure S2** Kinetic data of purified enzymes. All data was fitted to Michaelis-Menten kinetics for one substrate. **A)** AldT for the substrate D-mannose **B)** KDGA measured in the direction of aldol addition with pyruvate and glyceraldehyde as substrates **C)** LDH for the substrate pyruvate. Curve fitting was performed with Prism 6 (GraphPad software). All experiments were performed in triplicate. Error bars represent standard deviation of the mean.

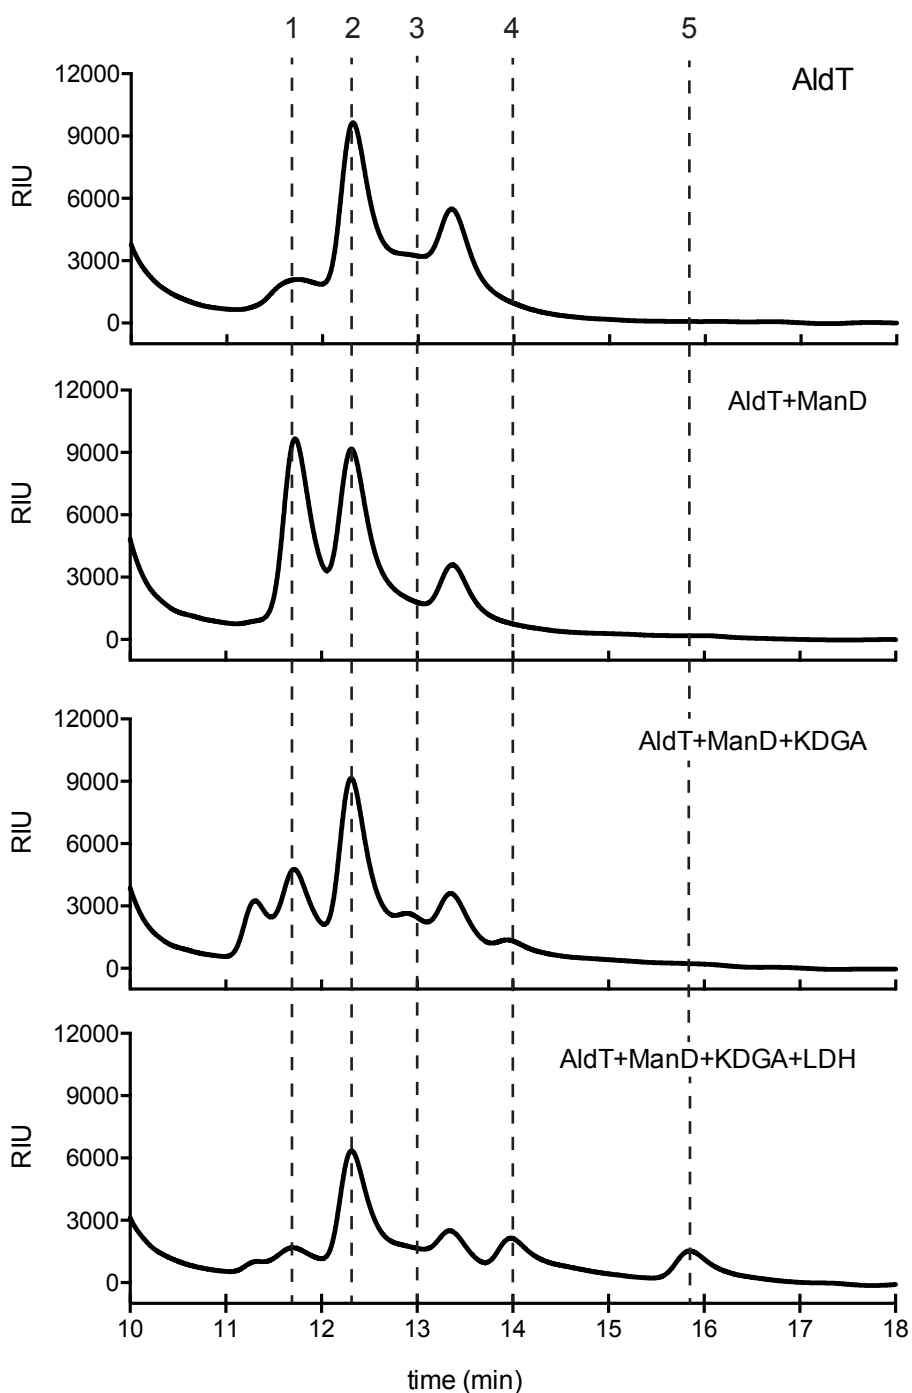

**Figure S3** Exemplary sequential enzymatic pathway reactions demonstrating the activity of each enzyme and product formation after addition of all enzymes. Reactions contained a final concentration of 20 mM mannose and  $\text{NAD}^+$  in NaP buffer pH 7.0 (50mM) and 0.1 mM  $\text{CoSO}_4$ . Enzyme loadings were: AldT: 0.16 U/ml, ManD: 0.07 U/ml, KDGA 0.51 U/ml, 5.8 U/ml LDH. Net retention times of standards for intermediates 1: KDG (11.69 min), 2: mannose (12.29 min), 3: pyruvate (13 min), 4: glyceraldehyde (14 min), 5: L-lactic acid (15.9 min). RIU: refractive index units. For separation of standards see Figure S4.

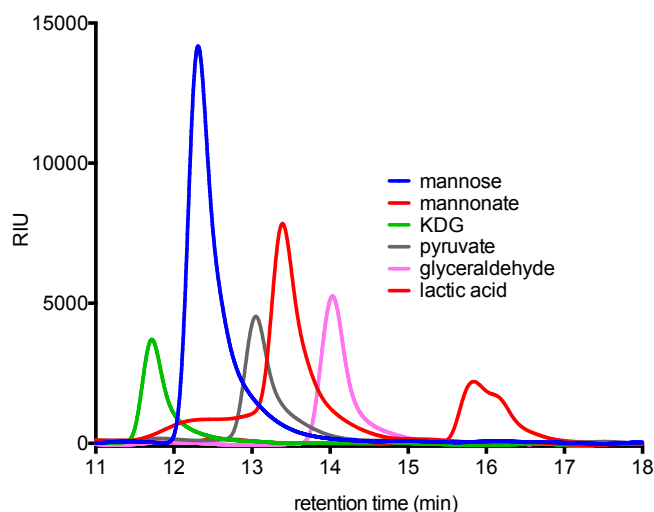

**Figure S4** Separation of intermediates on organic acid column. 10  $\mu$ l of 10 mM standards except from KDG (2.5 mM) were subjected to a Hiplax H<sup>+</sup> column connected to a RID (see Material and Methods for further details). Net retention times of standards are mentioned in Figure S3.

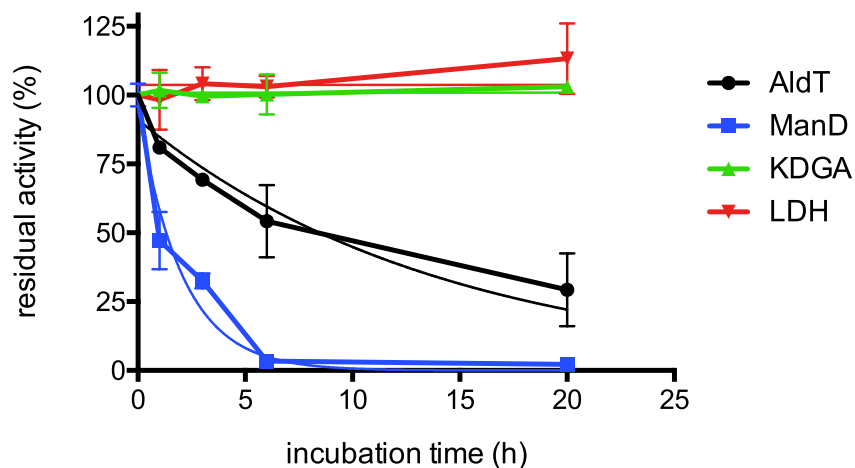

**Figure S5** Thermostability of AldT (black line), ManD (blue line), KDGA (green line) and LDH (red line) at their standard enzyme loading at 50°C over the duration of the process time. Residual activity is expressed relative to activity without any incubation at 50°C.

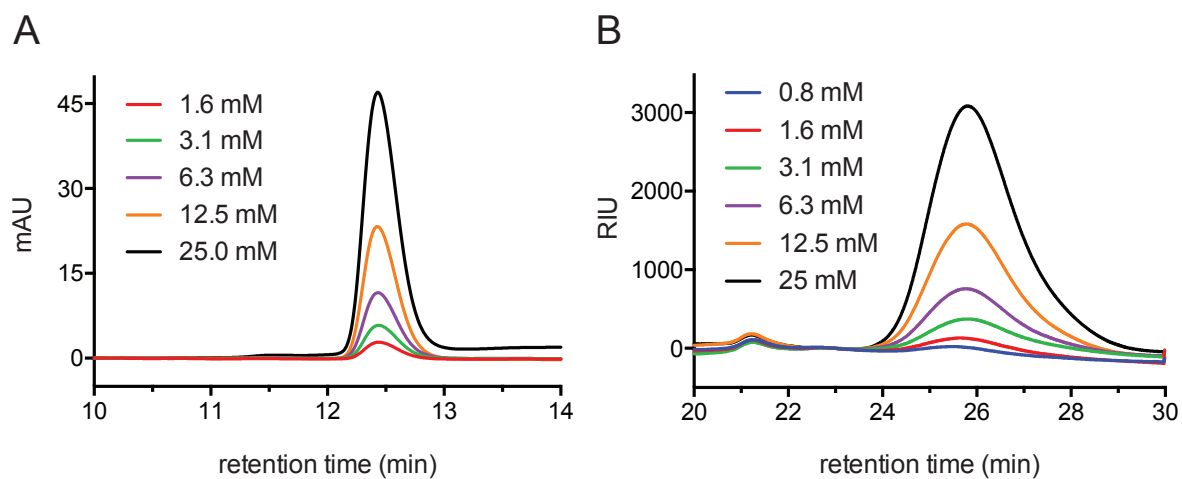

**Figure S6** Standards used for the quantification of L-lactic acid (**A**) and mannose (**B**) in time course experiments for the conversion of mannose obtained from SCG and pure mannose into LA. Standards for LA were analysed on a Bio-Rad Aminex HPX-87H column and standards for D-mannose on an Agilent HiPlex Pb column (see Material and Methods for further details). Net retention times for L-lactic acid and D-mannose standards were 12.5 min and 25.8 min, respectively.

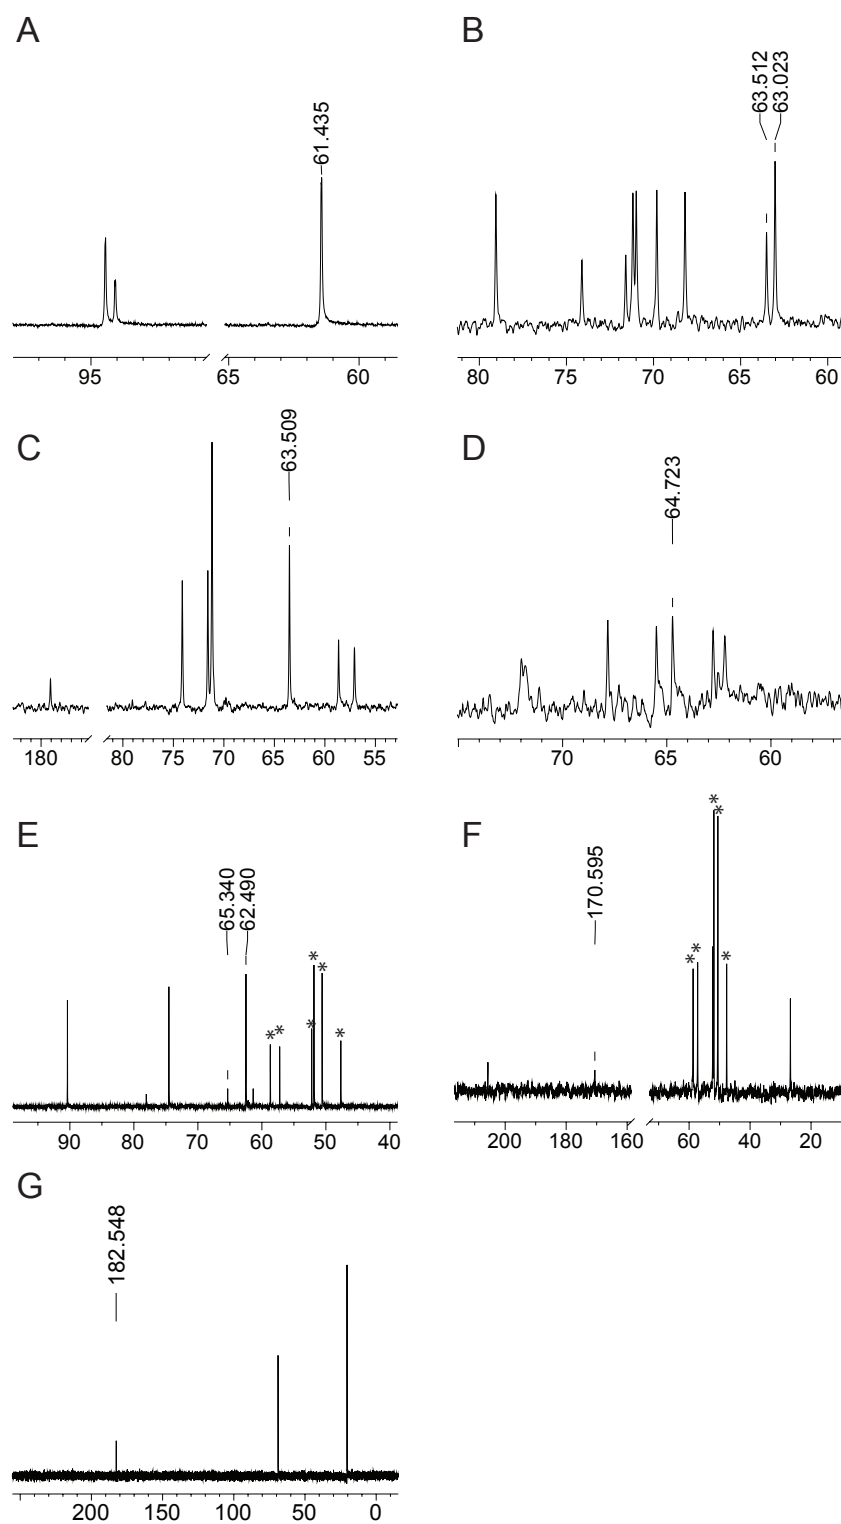

**Figure S7** Decoupled 1D  $^{13}\text{C}$  NMR spectra of standards. All values are expressed in ppm. All standards were acquired in 0.1 M NaP buffer pH 7.5 at 55°C. A: D-[1,6- $^{13}\text{C}_2$ ]mannose, B: mannono-1,4-lactone, C: mannonate, D: KDG, E: glyceraldehyde, F: pyruvate, G: L-lactic acid. Peaks labelled with numbers were found in real-time analysis of the reaction cascade, except for peak at 170.595 ppm for pyruvate. Peaks labelled with an asterisk (\*) are buffer contaminants in these samples.

**Table S2** Comparison of predicted chemical shifts, acquired chemical shifts of unlabelled standards and chemical shifts appearing in pathway reaction with D-[1,6-<sup>13</sup>C<sub>2</sub>]mannose and 10 mM NAD<sup>+</sup>. Standards were obtained in the same buffer as the reaction took place as described in Material and Methods. n.d.: not detected. Prediction was performed with ChemDraw Professional 16.0 software.

| Carbon atom    | prediction |       | pathway reaction          |        | standards                  |         |
|----------------|------------|-------|---------------------------|--------|----------------------------|---------|
|                | C1         | C6    | C1                        | C6     | C1                         | C6      |
| mannose        | 98.5       | 62.2  | 94.463 (α)<br>94.087 (β)  | 61.459 | 94.463 (α)<br>94.087 (β)   | 61.435  |
| mannonate      | 176.2      | 64.4  | 179.002                   | 63.518 | n.d.                       | 63.509  |
| mannonolactone | 175.3      | 64.6  | 178.168                   | 63.016 | n.d.                       | 63.024  |
| KDG            | 63.8       | 162.8 | 62.24<br>62.784<br>64.736 | -      | 62.228<br>62.782<br>64.723 | n.d.    |
| pyruvate       | -          | 162.8 | -                         | -      | -                          | 170.595 |
| glyceraldehyde | 59.2       | -     | 62.447<br>65.345          | -      | 62.490<br>65.340           | -       |
| L-lactic acid  | -          | 183   | 182.367                   | -      | -                          | 182.548 |

**Table S3** Reaction mechanisms used in the script for DynaFit. DynaFit performed nonlinear least-squares regressions to fit integrals of chemical shifts for each intermediate. Kinetic constants (k) are optimised by DynaFit; x: unknown compounds.

---

|                                             |        |
|---------------------------------------------|--------|
| mannose ---> mannonate                      | k1     |
| mannonate ---> KDG_1                        | k2     |
| mannose ---> mannonolactone                 | k3     |
| mannonolactone <==> mannonate               | k4, k5 |
| KDG_1 --> pyruvate + glyceraldehyde         | k6     |
| pyruvate + glyceraldehyde --> KDG_2         | k7     |
| glyceraldehyde ---> glyceraldehyde_oxidised | k8     |
| glyceraldehyde_oxidised --> x               | k9     |
| pyruvate ---> lactic_acid                   | k10    |
| lactic_acid ---> x                          | k11    |

---
